# Supplementary material
Source: ML conference proceedings conference paper supplement (https://openreview.net/forum?id=LQSlLfKAoZ)
Supplement: supplementary_material [file readme.pdf › readme.pdf]

# Video visualization of segmentation results.

- We provided 5 examples from testing set, and 3 examples from in-the-wild videos. All raw videos download from Youtube.
- Test methods: **MISA+MUSEUM** vs. Sa2VA-1B (ft.)
- Testing set
  - test\_1\_volume.mp4
  - test\_2\_rhythm.mp4
  - test\_3\_duration.mp4
  - test\_4\_firstlast.mp4
  - test\_5\_badquality.mp4
- In-the-wild videos
  - wild\_1\_rhythm.mp4
  - wild\_2\_volume.mp4
  - wild\_3\_sound.mp4

test\_1\_volume.mp4

The object making the loudest sound.  
MISA+MUSEUM

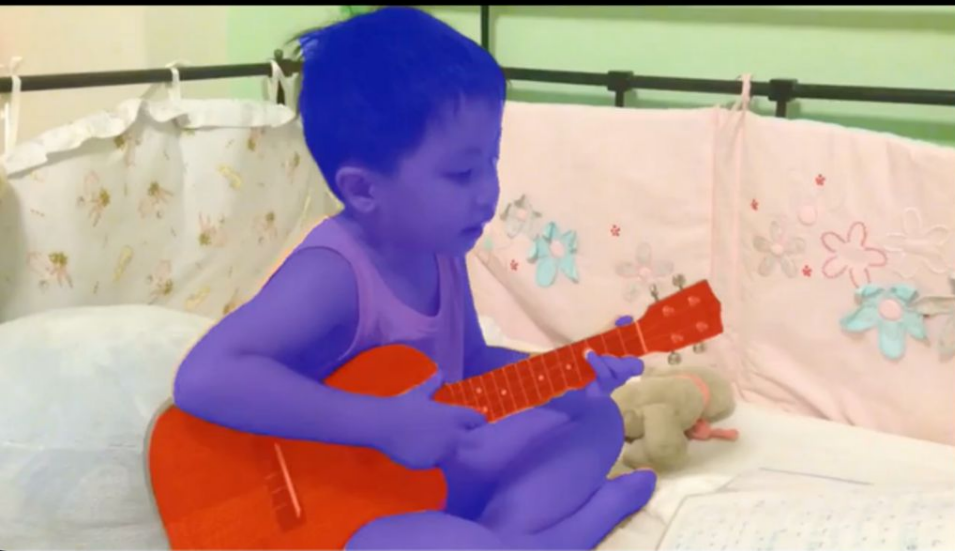

The object making the lowest sound.  
Sa2VA-1B (ft.)

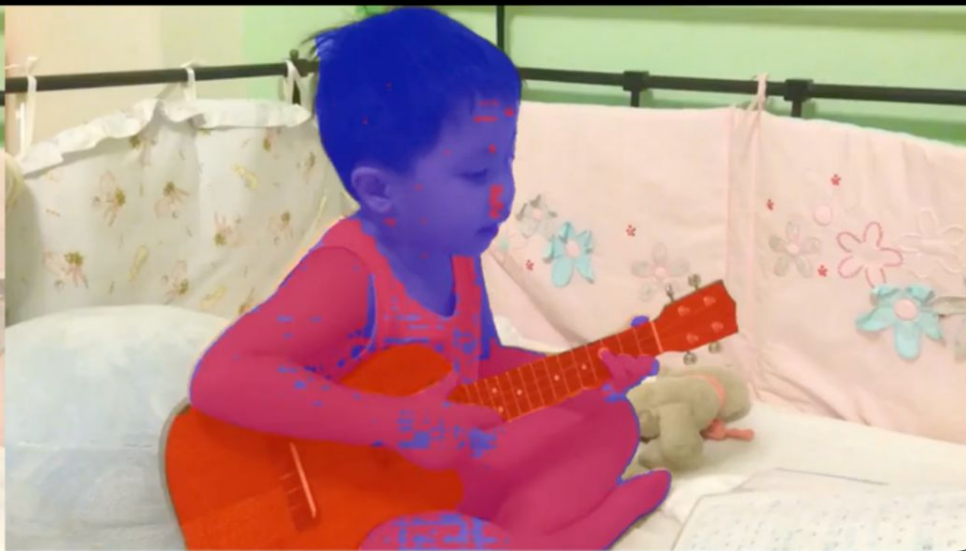

GT: boy; ukulele

# test\_2\_rhythm.mp4

The object making the fastest rhythm.

MISA+MUSEUM

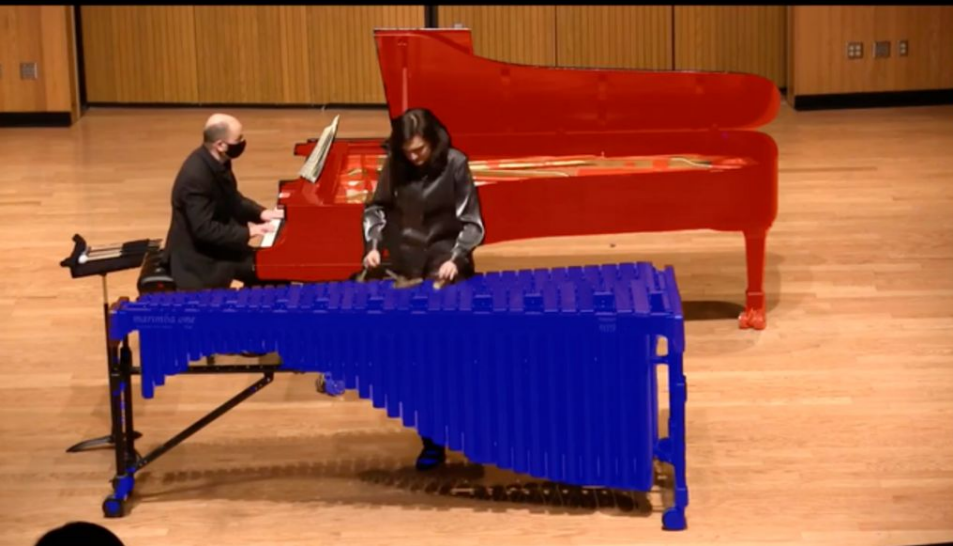

The object making the slowest rhythm.

Sa2VA-1B (ft.)

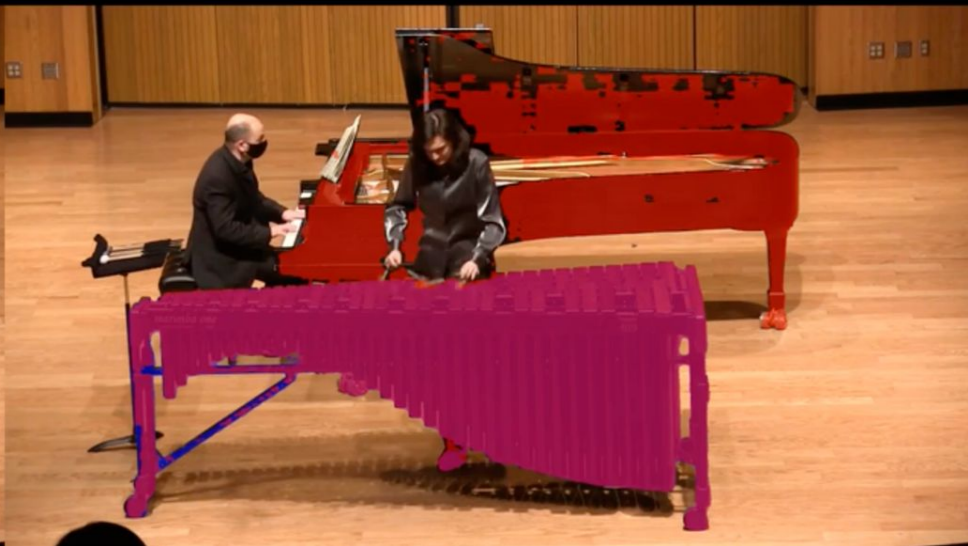

GT: marimba; piano

# test\_3\_duration.mp4

The object making the longest sound duration

MISA+MUSEUM

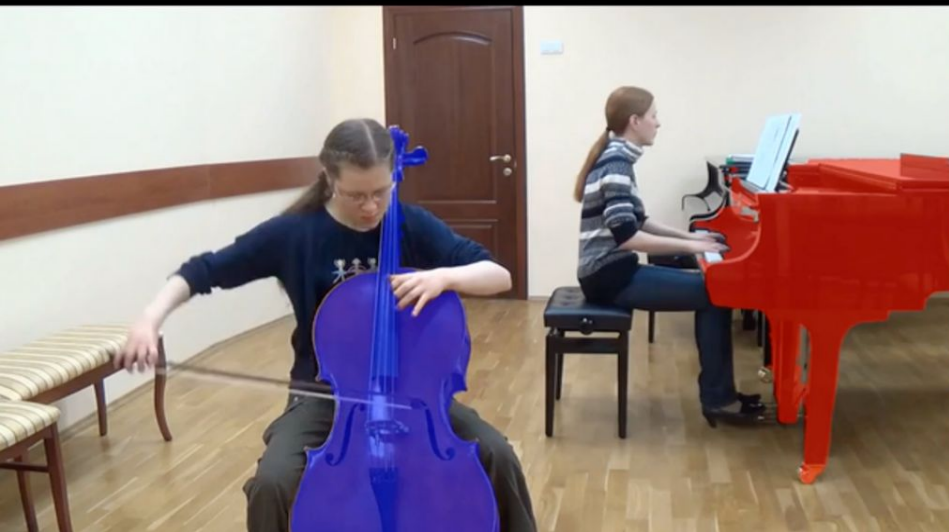

The object making the shortest sound duration

Sa2VA-1B (ft.)

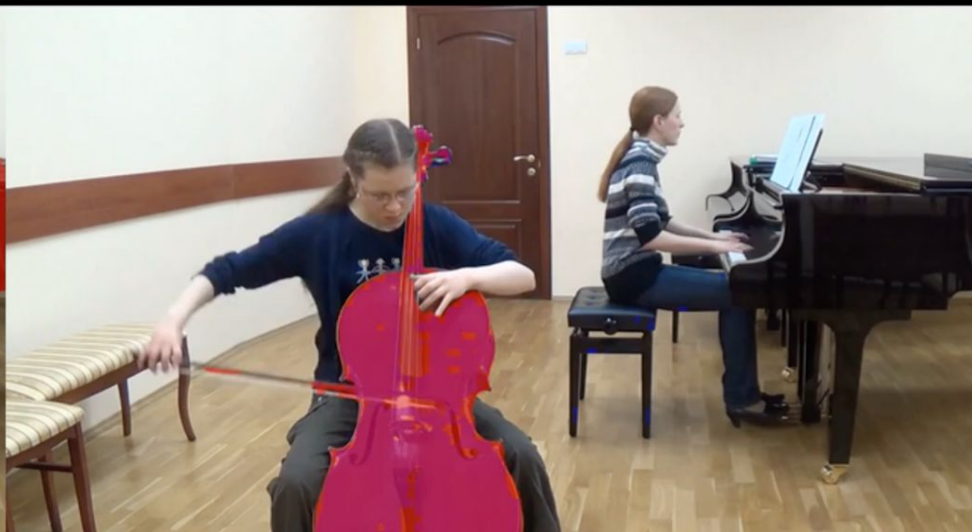

GT: **cello**; **piano**



test\_4\_firstlast.mp4

The first object to make a sound.

MISA+MUSEUM

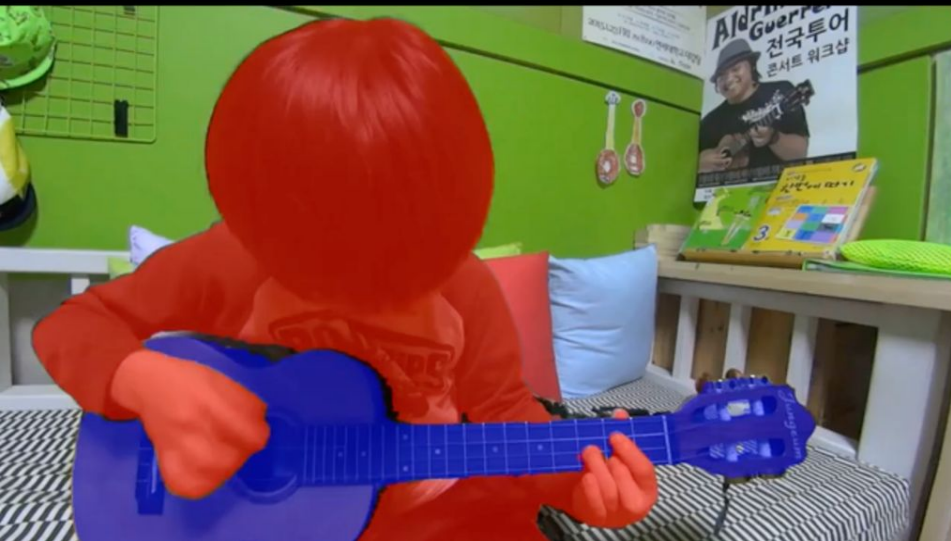

The last object to make a sound.

Sa2VA-1B (ft.)

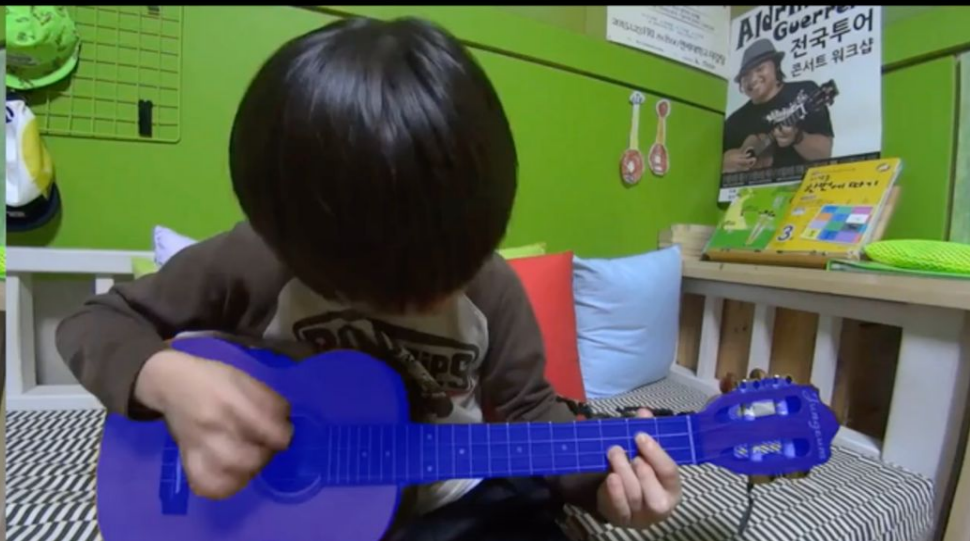

GT: **ukulele**; **boy**

test\_5\_badquality.mp4

The object making lower sound than the clarinet.  
MISA+MUSEUM

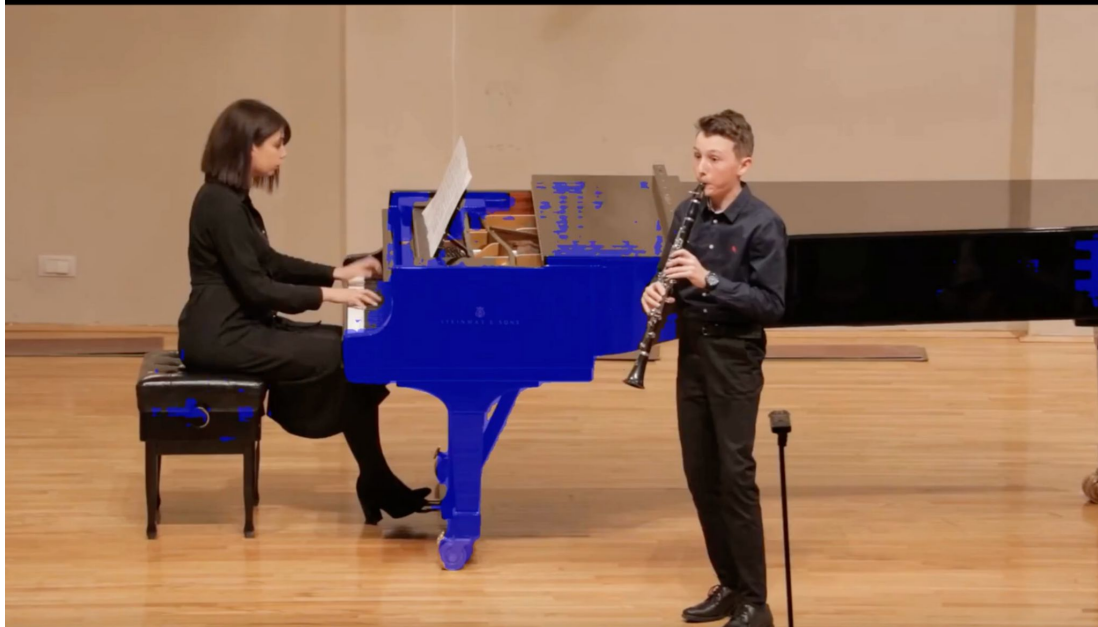

GT: **piano**

Showing a correct target, but bad quality example.

# wild\_1\_rhythm.mp4

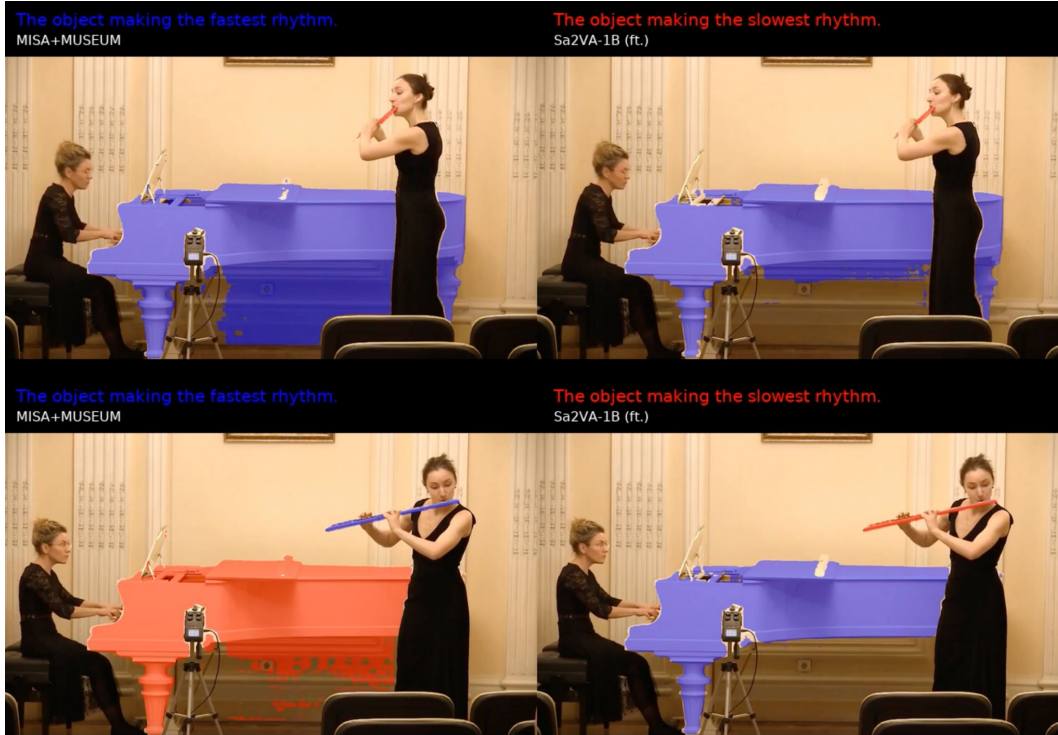

**Piano** might be playing in faster rhythm while **flute** might be playing in slower rhythm.

**Flute** might be playing in faster rhythm while **piano** might be playing in slower rhythm.

# wild\_2\_volume.mp4

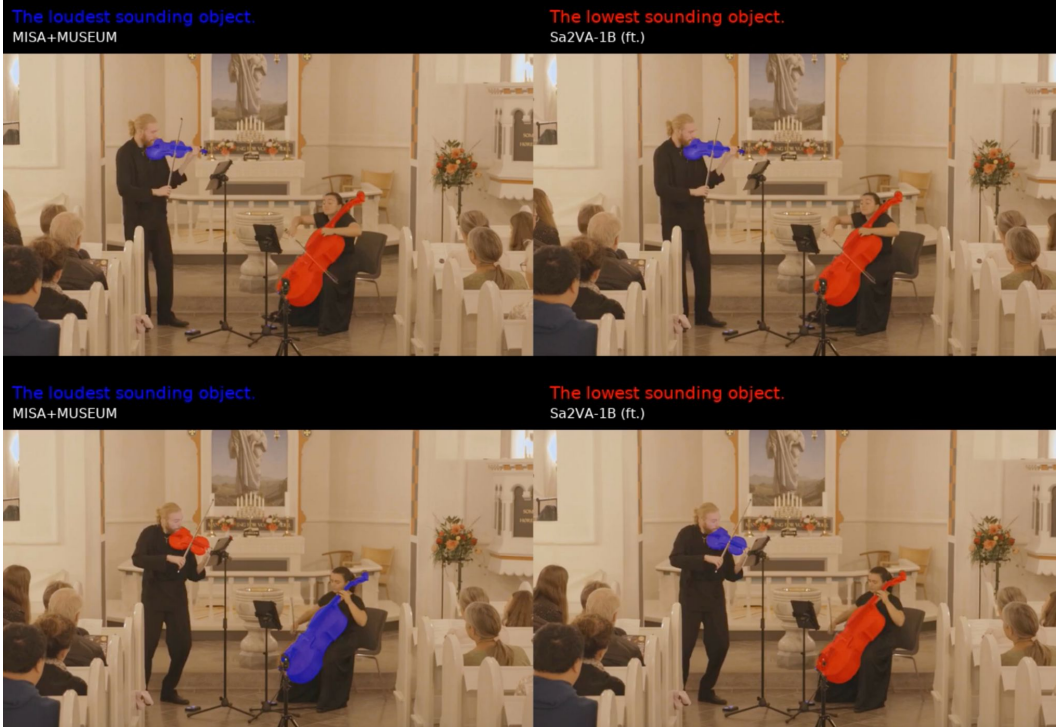

**Violin** might be playing in loudest sound while **cello** might be playing in lowest sound.

**Cello** might be playing in loudest sound while **violin** might be playing in lowest sound.



# wild\_3\_sound.mp4

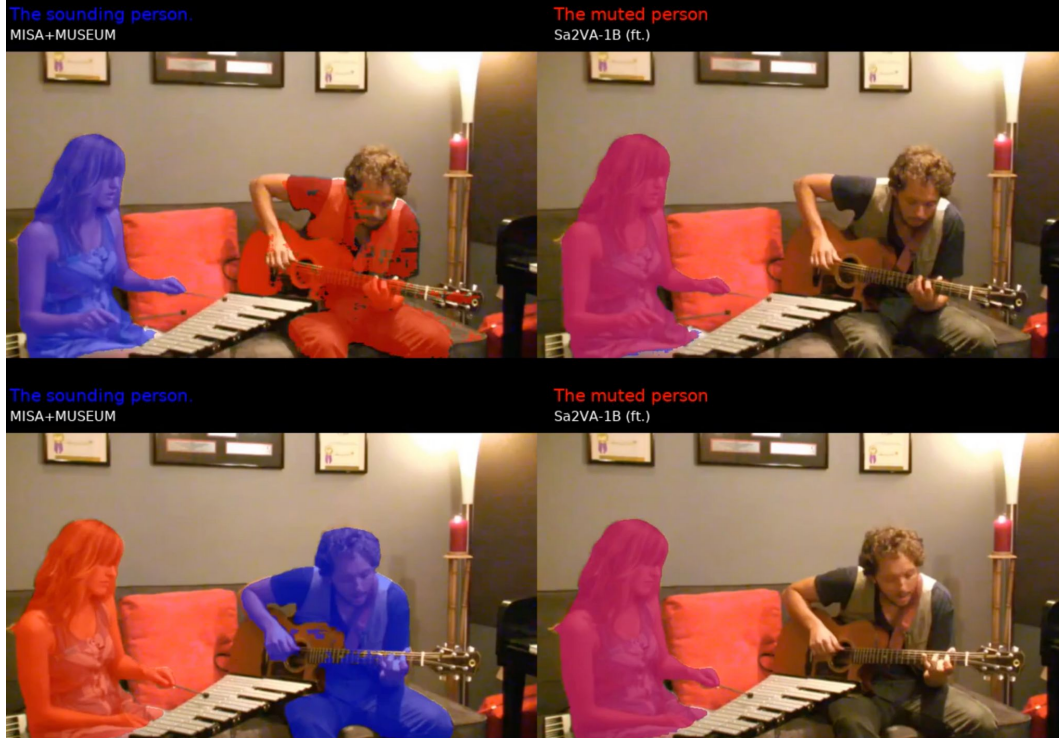

The **woman** should be the one who sings in the scene.

The **man** should be the one who sings in the scene.
